# Supplementary material for: BiVO4@TiO2 core–shell hybrid mesoporous nanofibers towards efficient visible-light-driven photocatalytic hydrogen production
Source: Royal Society of Chemistry journal article supplement (doi:10.1039/c9tc02480h), 2019-01-01
Supplement: c9tc02480h1.pdf [file c9tc02480h1.pdf]

[Electronic Supplementary Information](#)

**BiVO<sub>4</sub>@ TiO<sub>2</sub> Core-shell Hybrid Mesoporous Nanofibers towards Efficient Visible-light-driven Photocatalytic Hydrogen Production**

*Huilin Hou<sup>a</sup>, Lin Wang<sup>a</sup>, Fengmei Gao<sup>a</sup>, Xianfeng Yang<sup>b</sup> and Weiyu Yang<sup>a\*</sup>*

*<sup>a</sup>Institute of Materials, Ningbo University of Technology, Ningbo, 315016, P.R. China.*

*<sup>b</sup>College of Physics and Electronic Science, Changsha University of Science and Technology, Changsha City, 410114, P.R. China.*

Corresponding Author E-mail: [weiyuyang@tsinghua.org.cn](mailto:weiyuyang@tsinghua.org.cn) (W. Yang)

Tel: +86-574-87080966

Fax: +86-574-87081221

## Experimental Section

### *Synthesis of mesoporous BiVO<sub>4</sub> nanofibers*

The mesoporous BiVO<sub>4</sub> nanofibers were fabricated by a foaming-assisted electrospinning method. In a typical procedure, 0.5 g PVP was firstly dissolved in a mixed solvent containing 2 g DMF, 3 g acetic and 1 g ethanol. Then the obtained mixture was vigorously stirred for 3 h to make the PVP be completely dissolved. After that, 5 mmol Bi(NO<sub>3</sub>)<sub>3</sub>·5H<sub>2</sub>O and Vo(acac)<sub>2</sub> were added into the above solution, followed by being magnetically stirred for 2 h. Subsequently, 1 g diisopropylazodiformate (DIPA, C<sub>8</sub>H<sub>14</sub>N<sub>2</sub>O<sub>4</sub>) used as the foaming agent was introduced to the solution and stirred for another 2 h. The resultant solution was transferred into a plastic injector with a stainless-steel needle serving as an anode and a low-speed rotating cylinder acting as the collector (cathode). An electrical potential of 20 kV was applied for the electrospinning. The as-spun precursor fibers were dried at room temperature overnight. Finally, the precursor was calcined at 500 °C for 1 h with a heating rate of 5 °C min<sup>-1</sup>, followed by furnace cool to ambient temperature.

### *Synthesis of mesoporous BiVO<sub>4</sub>@TiO<sub>2</sub> hybrid nanofibers*

The as-synthesized mesoporous BiVO<sub>4</sub> nanofibers were then loaded into a Cambridge Nanotech S200 atomic layer deposition (ALD) system for the deposition of TiO<sub>2</sub>. Each ALD cycle consisted of a 0.05 s pulse of H<sub>2</sub>O, followed by a 0.10 s pulse of isopropyl titanate (Sigma-Aldrich, 99.999%). A 25-s purge under a constant 0.05 L min<sup>-1</sup> flow of research-grade Ar was performed between each pulse. When idle, the ALD system maintained a continuous Ar purge under a base pressure of 2.7×10<sup>-1</sup> Torr. The ALD process was fixed at 30, 50, 80 and 100 cycles of pulsed precursors to tailor the thicknesses of the deposited TiO<sub>2</sub> layer around the mesoporous BiVO<sub>4</sub> nanofibers. The obtained samples are referred

to as  $\text{BiVO}_4@\text{TiO}_2^n$  (the number of n refers to the given cycles of ALD).

### ***Microstructural Characterization***

The products were examined using a field emission scanning electron microscope (FESEM, S-4800, Hitachi, Japan). Transmission electron microscopy (TEM) images were collected under a JEM-2100F electron microscopy (JEOL, Japan), together with energy-dispersive X-ray spectroscopy (EDX, Quantax-STEM, Bruker, Germany). The obtained products were characterized with X-ray powder diffraction (XRD, D8 Advance, Bruker, Germany) with Cu  $K\alpha$  radiation ( $\lambda=1.5406 \text{ \AA}$ ). The optical properties were tested on an ultraviolet-visible spectrophotometer (U-3900 spectrophotometer, Hitachi, Japan). X-ray photoelectron spectroscopy (XPS) was performed on a Thermo ESCALAB 250XI electron spectrometer under ultrahigh vacuum condition. All of the binding energies were calibrated by using surface adventitious carbon (C 1s at 285.4 eV) as a reference.

### ***Photocatalytic hydrogen production measurements***

The photocatalytic activity of the resultant products was evaluated for hydrogen evolution in the absence of co-catalysts, which was performed in an inner-irradiation quartz annular reactor with a 300-W Xenon lamp (CEL, HUL300), a vacuum pump, a gas collector, a recirculation pump and a water-cooled condenser. The as-synthesized samples (0.05 g) were suspended in a mixture with a deionized water and methanol solution (40 mL, 3:1) by an ultrasonic oscillator. The mixture was then transferred into the reactor and desiccated under a vacuum pump. A Xenon lamp with a 420-nm cut-off quartz optical filter was utilized as the light source, and the cooling water was circulated through a cylindrical Pyrex jacket located around the light source to maintain the reaction temperature. The reactor was

sealed with ambient air during irradiation, and the hydrogen evolution was monitored by online gas chromatography (GC, 7900) equipped with a Porapak-Q column, high-purity nitrogen carrier and a thermal conductivity detector (TCD).

### ***Photoelectrochemical Measurements***

Photoelectrochemical measurements were carried out with an Autolab PGSTAT302G workstation by using a typical three-electrode setup. To fabricate the photoanodes, the products were coated on the FTO glass through spin-coating. The prepared photoanodes were used as the working electrode, with a Pt plate and an Ag/AgCl electrode using as the counter and reference electrodes, respectively. The illumination was carried out under a 300-W xenon lamp and a 420-nm cut-off quartz optical filter with a typical illuminating area of 1 cm<sup>2</sup> for all measurements. All experiments were performed in 0.5 M Na<sub>2</sub>SO<sub>4</sub> electrolyte solution. The scan rate of linear sweep voltammetry (LSV) curves was measured with a scan rate of 25 mV s<sup>-1</sup>. The electrochemical impedance spectroscopy (EIS) was recorded with a frequency range from 10<sup>-1</sup> to 10<sup>5</sup> Hz under a 10 mV amplitude at an open-circuit voltage.

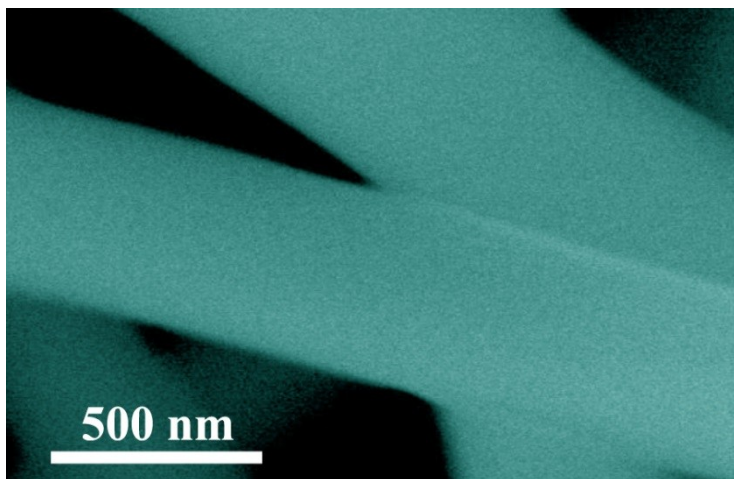

**Fig. S1.** Typical SEM image of as-spun  $\text{BiVO}_4$  polymer nanofibers

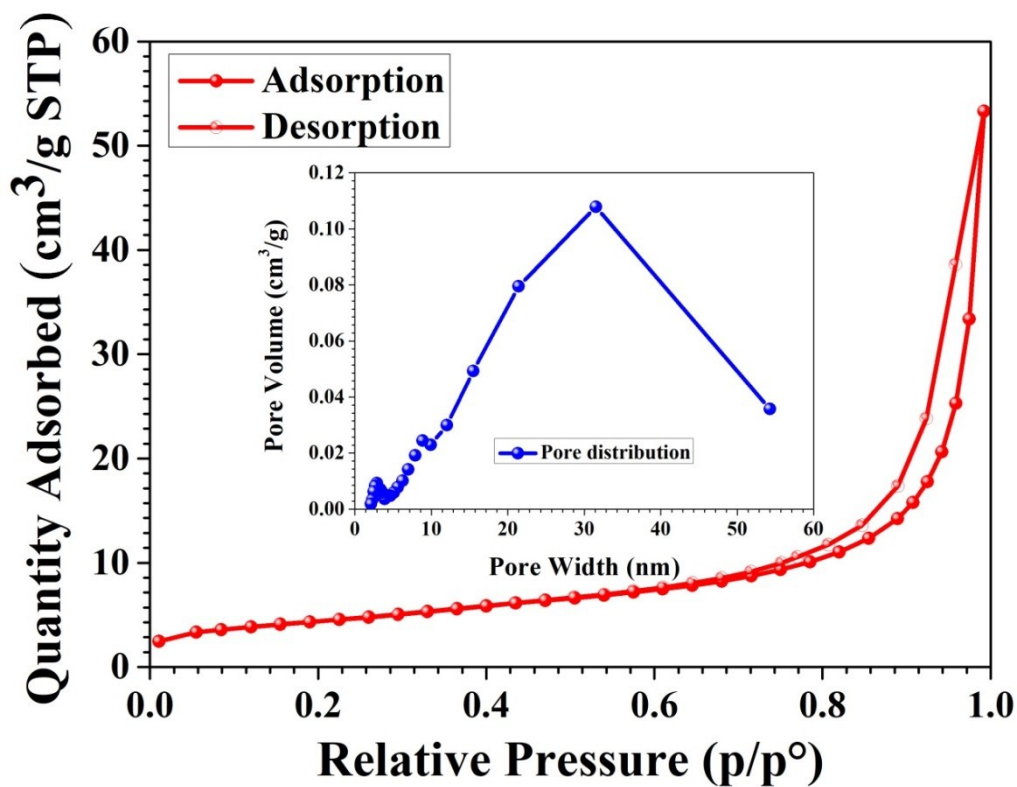

Fig. S2. N<sub>2</sub> adsorption and pore distribution (the inset) of the mesoporous BiVO<sub>4</sub> nanofibers.

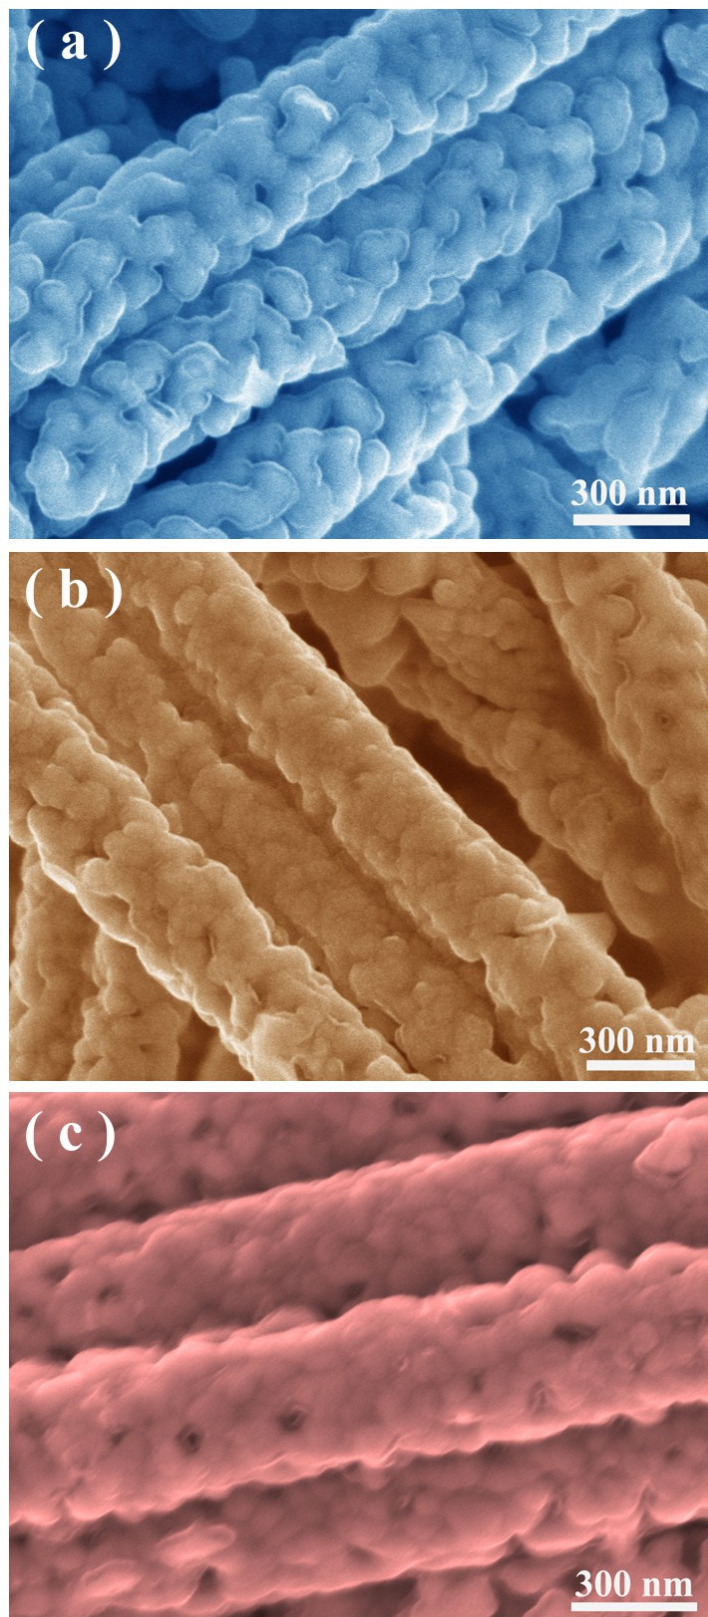

**Fig. S3.** Typical SEM images of  $\text{BiVO}_4@\text{TiO}_2$  core-shell nanofibers with different  $\text{TiO}_2$

ALS cycles: (a) 30, (b) 80 and (c) 100.

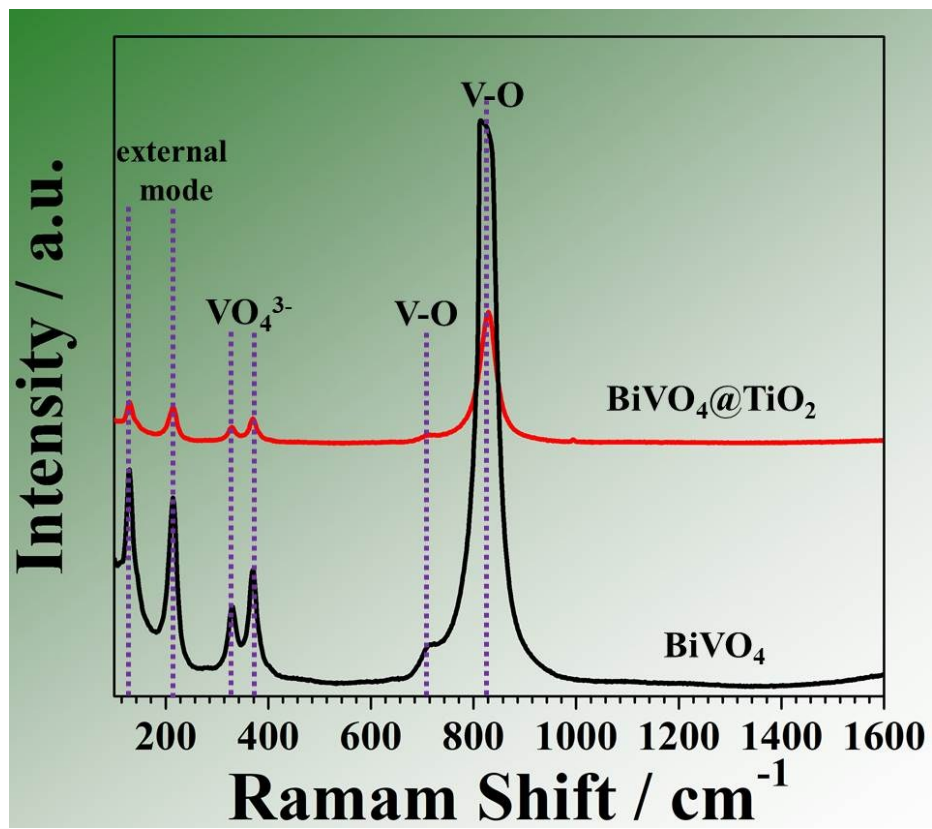

**Fig. S4.** Representative Raman spectrum of pure BiVO<sub>4</sub> and BiVO<sub>4</sub>@TiO<sub>2</sub> core-shell nanofibers.



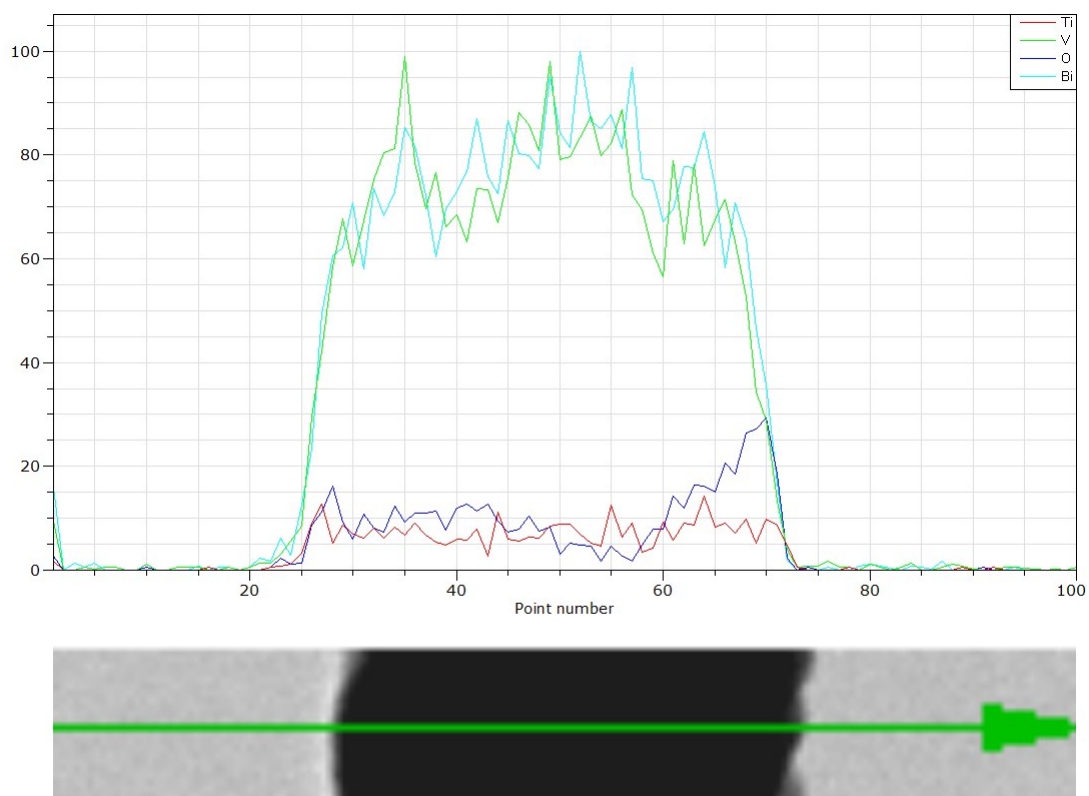

**Fig. S5.** Typical EDX line scanning of  $\text{BiVO}_4@ \text{TiO}_2$  core-shell nanofiber.

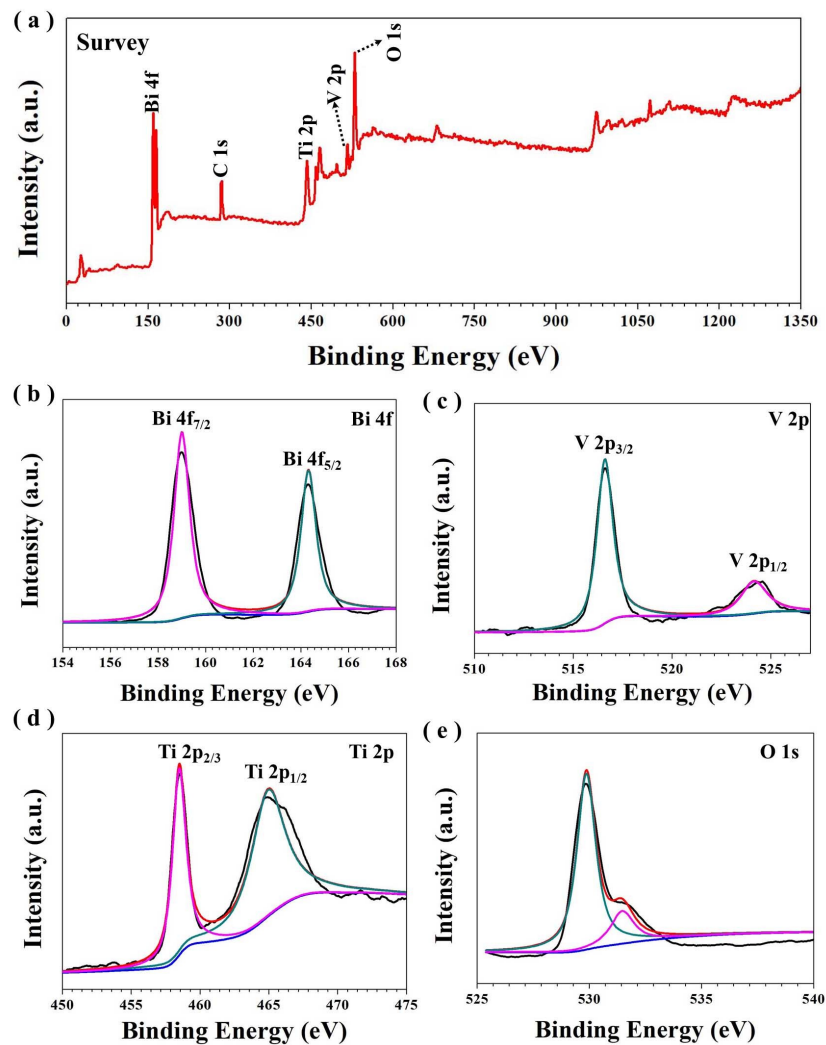

**Fig. S6.** XPS spectra of the BiVO<sub>4</sub>@TiO<sub>2</sub> core-shell nanofiber: survey (a), Bi 4f (b), V 2p (c), Ti 2p (d) and O 1s (e).

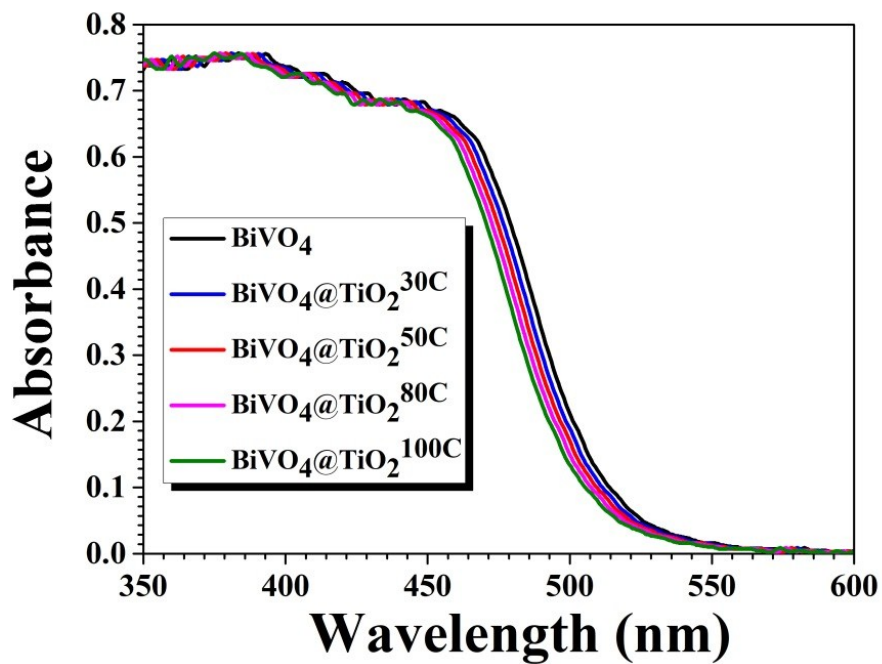

**Fig. S7.** Typical UV-Vis diffuse reflection spectra of samples with different cycles of ALD TiO<sub>2</sub>.

**Table S1.** Comparison of the related work for photocatalytic H<sub>2</sub> production

| <b>Material</b>                         | <b>Morphology</b>                | <b>Cocatalyst</b> | <b>Irradiation conditions</b>                      | <b>Reaction solution</b> | <b>Activity (μmol h<sup>-1</sup>)</b> | <b>Reference</b> |
|-----------------------------------------|----------------------------------|-------------------|----------------------------------------------------|--------------------------|---------------------------------------|------------------|
| BiVO <sub>4</sub> /TiO <sub>2</sub>     | Nanoparticles                    | Pt                | 300 W xenon light with a 200-400 nm cut off filter | Water+Methanol           | 2.2                                   | 1                |
| TiO <sub>2</sub> /BiVO <sub>4</sub>     | Nanoparticles film               | Pt                | 300 W Xe lamp with cutoff filter of 420 nm         | Water+Methanol           | 6                                     | 2                |
| BiVO <sub>4</sub> /TiO <sub>2</sub> /Ag | Nanoparticles                    | ---               | 300 W Xe lamp with cutoff filter of 420 nm         | Water+Methanol           | 4.2                                   | 3                |
| TiO <sub>2</sub> /BiVO <sub>4</sub>     | Nanoparticles                    | ---               | 300 W Xe lamp                                      | Water                    | 18.1(0.41ml h <sup>-1</sup> )         | 4                |
| BiVO <sub>4</sub> /SnO <sub>2</sub>     | Screw-like                       | Pt                | 500 W xenon light with a 200–400 nm cut off filter | Water+Methanol           | 1.16                                  | 5                |
| BiVO <sub>4</sub> /TiO <sub>2</sub>     | Mesoporous core-shell nanofibers | ---               | 300 W Xe lamp with cutoff filter of 420 nm         | Water+MeOH               | 6                                     | Current work     |

## References

1. M. Xie, X. Fu, L. Jing, P. Luan, Y. Feng and H. Fu, *Adv. Energy Mater.*, 2014, **4**, 1300995.
2. M. Xie, Y. Feng, X. Fu, P. Luan and L. Jing, *J. Alloy. Compd.*, 2015, **631**, 120-124.
3. J. Bian, Y. Qu, R. Fazal, X. Li, N. Sun and L. Jing, *J. Phys. Chem. C*, 2016, **120**, 11831-11836.
4. Z. Jian, S. Huang, Y. Cao and Y. Zhang, *Photochem. Photobiol.*, 2016, **92**, 363-370.
5. M. Xie, Z. Zhang, W. Han, X. Cheng, X. Li and E. Xie, *J. Mater. Chem. A*, 2017, **5**, 10338-10346.
